# Supplementary material for: Sensitivity of human meningioma cells to the cyclin-dependent kinase inhibitor, TG02
Source: PubMed Central journal article supplement — Transl Oncol. 2020 Sep 8;13(12):100852. doi: 10.1016/j.tranon.2020.100852 (PMC7490722; doi:10.1016/j.tranon.2020.100852), 2020-09-08
Supplement: mmc4.pdf [file mmc4.pdf]

Table S1. Genetic variants or alterations of unknown significance.

| Sample type | ID      | Gene   | Amino acid change | Type of alteration                          | SNP138 database | Interpretation       |
|-------------|---------|--------|-------------------|---------------------------------------------|-----------------|----------------------|
| Tissue      | ZH-679  | D2HGDH | Y398H             | nonsynonymous SNV                           | NA              | unclear              |
| Tissue      | ZH-679  | ARID1B | N1672S            | nonsynonymous SNV                           | rs140177120     | unclear              |
| Tissue      | ZH-679  | MYBL1  | G197E             | nonsynonymous SNV                           | rs201510981     | unclear              |
| Tissue      | ZH-679  | TSC2   | I463V             | nonsynonymous SNV                           | rs45517171      | unclear              |
| Tissue      | ZH-679  | BRCA1  | NA                | nonframeshift substitution                  | NA              | artifact             |
| Tissue      | ZH-696  | MSH6   | A49V              | nonsynonymous SNV                           | NA              | unclear              |
| Tissue      | ZH-696  | CCND1  | E76V              | nonsynonymous SNV                           | NA              | unclear              |
| Tissue      | ZH-696  | TRAF7  | R356W             | nonsynonymous SNV                           | NA              | potentially relevant |
| Tissue      | ZH-696  | NF2    | S87X              | stopgain SNV                                | NA              | relevant             |
| Tissue      | ZH-696  | ARID1A | K980fs            | frameshift deletion                         | NA              | potentially relevant |
| Tissue      | ZH-706  | NOTCH2 | R91L              | nonsynonymous SNV                           | rs143195893     | unclear              |
| Tissue      | ZH-706  | KMT2D  | V4178L            | nonsynonymous SNV                           | NA              | unclear              |
| Tissue      | ZH-706  | GNAS   | P345R             | nonsynonymous SNV                           | rs200430001     | unclear              |
| Tissue      | ZH-706  | BRCA1  | NA                | nonframeshift substitution                  | NA              | artifact             |
| Tissue      | ZH-707  | SMO    | W535L             | nonsynonymous SNV                           | rs121918347     | relevant             |
| Tissue      | ZH-707  | PTCH1  | V482M             | nonsynonymous SNV                           | NA              | unclear              |
| Tissue      | ZH-707  | KMT2D  | S1065T            | nonsynonymous SNV                           | NA              | unclear              |
| Tissue      | ZH-707  | NF1    | A1676T            | nonsynonymous SNV                           | NA              | unclear              |
| Cells       | ZH-707b | PTCH1  | V482M             | nonsynonymous SNV                           | NA              | unclear              |
| Cells       | ZH-707b | KMT2D  | S1065T            | nonsynonymous SNV                           | NA              | unclear              |
| Cells       | ZH-707b | NF1    | A1676T            | nonsynonymous SNV                           | NA              | unclear              |
| Tissue      | ZH-719  | NF2    | 55_60del          | nonframeshift deletion                      | NA              | relevant             |
| Tissue      | ZH-733  | NOTCH1 | R1350L            | nonsynonymous SNV                           | rs150343794     | unclear              |
| Tissue      | ZH-733  | ATM    | Y1124X            | stopgain SNV                                | NA              | potentially relevant |
| Tissue      | ZH-733  | PTEN   | I101fs            | frameshift deletion                         | NA              | potentially relevant |
| Cells       | ZH-733  | MSH2   | R293K             | nonsynonymous SNV                           | NA              | unclear              |
| Cells       | ZH-733  | NOTCH1 | R1350L            | nonsynonymous SNV                           | rs150343794     | unclear              |
| Cells       | ZH-733  | ATM    | Y1124X            | stopgain SNV                                | NA              | potentially relevant |
| Cells       | ZH-733  | TP53   | D149Y             | nonsynonymous SNV                           | NA              | potentially relevant |
| Cells       | ZH-733  | TP53   | S83R              | nonsynonymous SNV                           | NA              | unclear              |
| Tissue      | ZH-734  | TSC2   | G440S             | nonsynonymous SNV                           | rs45484298      | unclear              |
| Tissue      | ZH-734  | GNAS   | G334D             | nonsynonymous SNV                           | NA              | unclear              |
| Tissue      | ZH-734  | NF2    | Y398X             | stopgain SNV                                | NA              | relevant             |
| Tissue      | ZH-734  | PTEN   | R335fs            | frameshift insertion                        | NA              | potentially relevant |
| Cells       | ZH-734  | MSH6   | A49V              | nonsynonymous SNV                           | NA              | unclear              |
| Cells       | ZH-734  | CCND1  | E76V              | nonsynonymous SNV                           | NA              | unclear              |
| Cells       | ZH-734  | NF2    | S87X              | stopgain SNV                                | NA              | relevant             |
| Cells       | ZH-734  | NOTCH2 | 6_6del            | frameshift deletion                         | NA              | artifact             |
| Tissue      | ZH-735  | NF2    | Y61X              | stopgain SNV                                | NA              | relevant             |
| Tissue      | ZH-735  | NF2    | NA                | nonframeshift substitution<br>c.183_186AGCA | NA              | relevant             |

|       |        |        |       |                                                    |    |                      |
|-------|--------|--------|-------|----------------------------------------------------|----|----------------------|
| Cells | ZH-739 | RET    | T338I | nonsynonymous SNV                                  | NA | unclear              |
| Cells | ZH-739 | TRAF7  | N520S | nonsynonymous SNV                                  | NA | potentially relevant |
| Cells | ZH-739 | NOTCH1 | NA    | nonframeshift substitution<br>c.5094_5103TGTGCCGCG | NA | artifact             |

All detected variants in samples analyzed by panel sequencing. Sample type, ID within this study, amino acid change, and type of alteration are stated. If available, the rs number from the SNP138 database is provided. Interpretation of relevance is based on (a) SNP138 and ClinVar entries if available, (b) established relevance of the gene in meningioma, (c) configuration of the variant (e.g. protein sequence disruption is rather categorized as potentially relevant than single base exchanges). Frequent calling artifacts are also annotated.
