# Supplementary figures and images for: Sensitivity of human meningioma cells to the cyclin-dependent kinase inhibitor, TG02
Source: PubMed Central journal article supplement — Transl Oncol. 2020 Sep 8;13(12):100852. doi: 10.1016/j.tranon.2020.100852 (PMC7490722; doi:10.1016/j.tranon.2020.100852), 2020-09-08

Figure S2

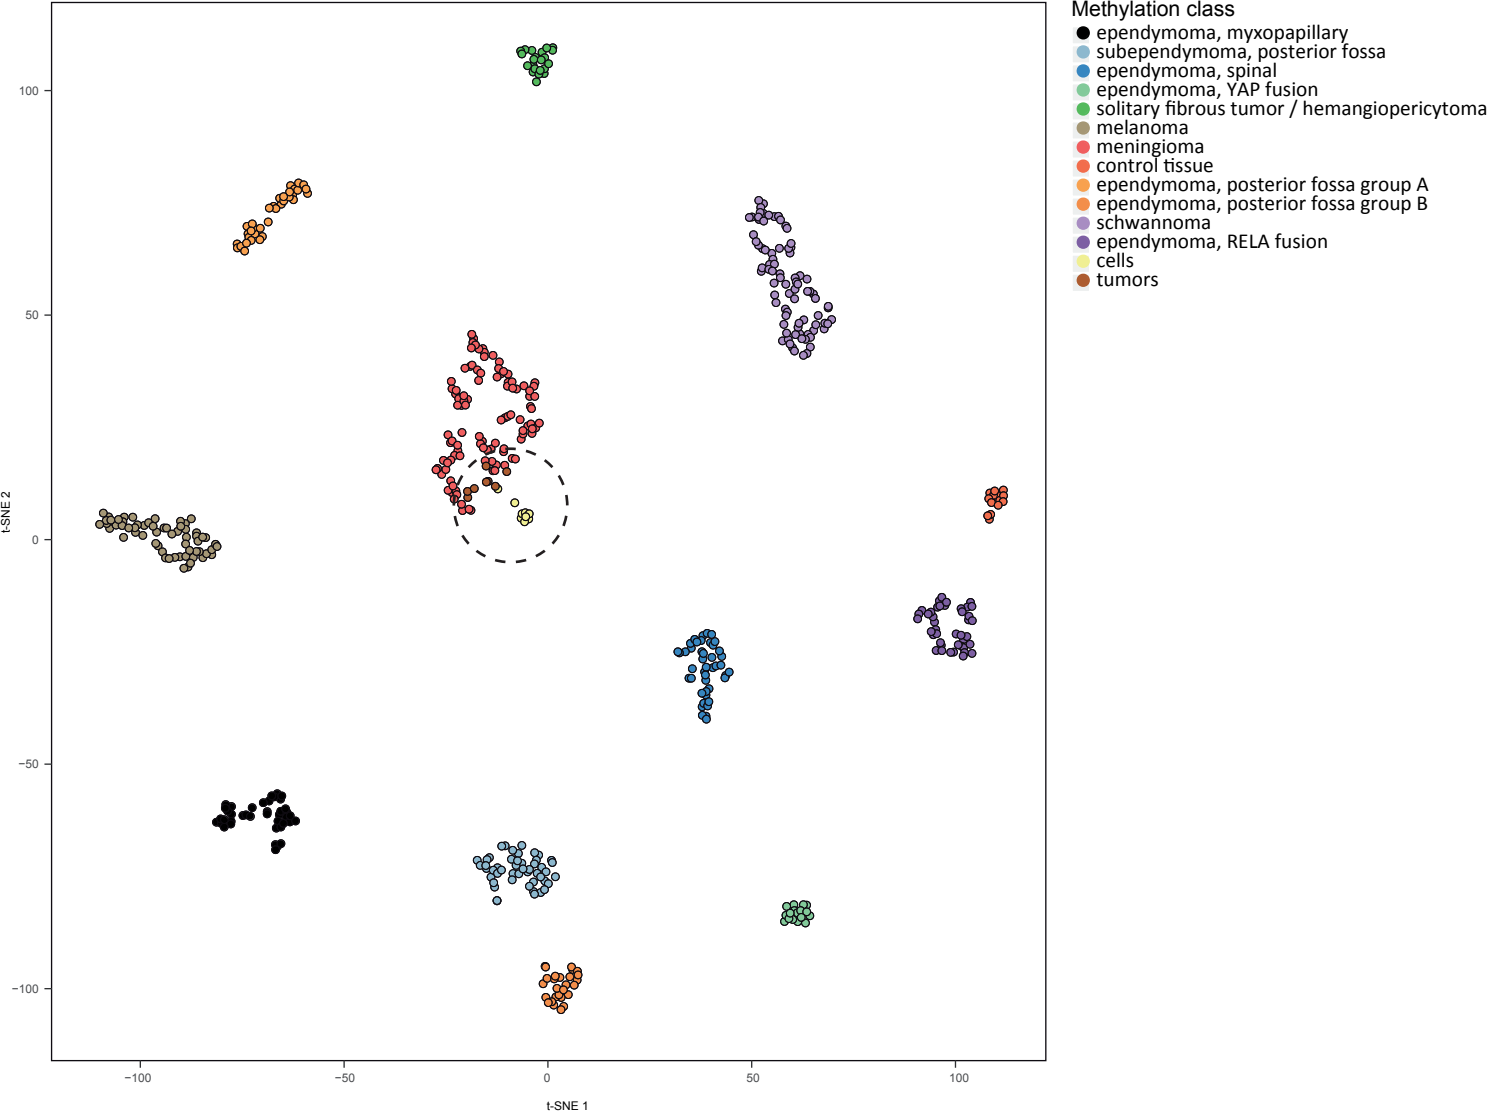

Supplement: mmc2.pdf [file mmc2.pdf]

# Figure S3

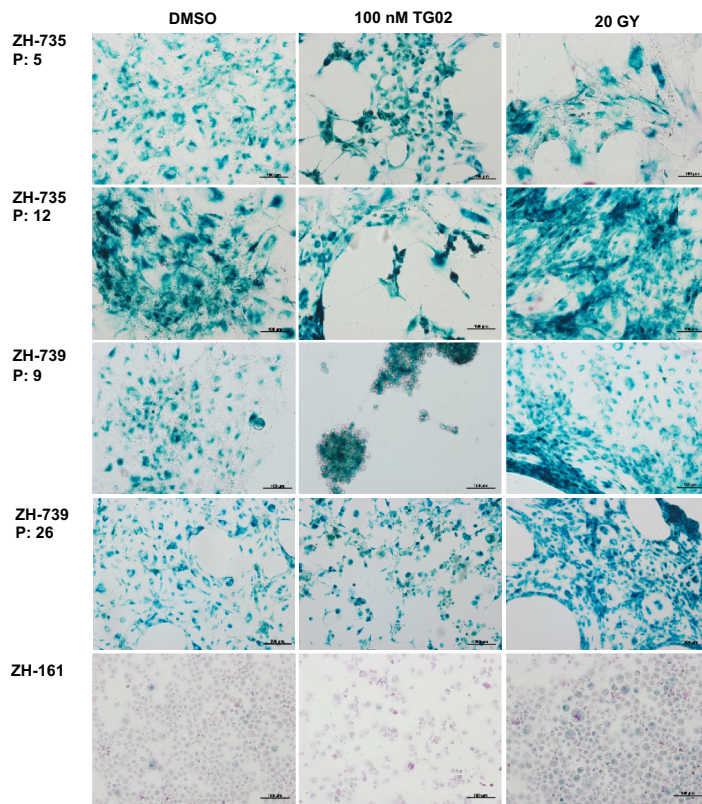

Supplement: mmc3.pdf [file mmc3.pdf]
